# Supplementary material for: High photocatalytic performance of ZnGa 2 O 4 /Ga 2 O 3 double-shell hollow sphere structures prepared via a one-step hydrothermal method
Source: Royal Society of Chemistry journal article supplement (doi:10.1039/d5ma00179j), 2025-01-01
Supplement: d5ma00179j1.pdf [file d5ma00179j1.pdf]

# High photocatalytic performance of $\text{ZnGa}_2\text{O}_4/\text{Ga}_2\text{O}_3$ double shell hollow sphere structure prepared by one-step hydrothermal method

*Zeyu Yang<sup>1</sup>, Jizhou Yang<sup>2</sup>, Haibo Fan<sup>2\*</sup>*

<sup>1</sup>School of Microelectronics, Xidian University, Xi'an 710071, China

<sup>2</sup>School of Physics, Northwestern University, Xi'an 710127, China

Corresponding author: [hbfan@nwnu.edu.cn](mailto:hbfan@nwnu.edu.cn)

## 1. Preparation of $\text{ZnGa}_2\text{O}_4/\text{Ga}_2\text{O}_3$ heterojunction

The specific steps are as follows:

(1) The precursor HS-Z obtained in 2.2.1,  $\text{GaCl}_3$  and triphenylamine ( $\text{C}_{18}\text{H}_{15}\text{N}$ ) were dissolved in 40 mL DMF in different proportions as shown in Table S1, and stirred evenly. Since HS-Z is already obtained, it is only necessary to generate the precursor of  $\text{Ga}_2\text{O}_3$  on its surface. Therefore, the hydrothermal temperature is set to 240 °C and the hydrothermal time is set to 8 h. It should be noted that the ratio in the table is the ratio of  $\text{GaCl}_3$  and HS-Z, and ZG0 is a  $\text{ZnGa}_2\text{O}_4$  double-shell hollow sphere obtained by direct annealing of HS-Z. The GO sample is a precursor of  $\text{GaCl}_3$  and  $\text{C}_{18}\text{H}_{15}\text{N}$  hydrothermal preparation, and  $\text{Ga}_2\text{O}_3$  quantum dots are obtained by annealing at the same temperature.

(2) After the hydrothermal reaction, the precipitate is centrifugally washed and dried. The product was heated at 2 °C/min, held for 2 h at 600 °C, and then cooled naturally. The  $\text{ZnGa}_2\text{O}_4/\text{Ga}_2\text{O}_3$  heterojunctions with different composite proportions can be obtained.

**Table S1** Amounts of the reagents used to prepare the samples.

| Sample Name | Ratio | GaCl <sub>3</sub> /mol | C <sub>18</sub> H <sub>15</sub> N/mol | HS-Z/mol |
|-------------|-------|------------------------|---------------------------------------|----------|
| ZG0         | 0:1   | 0                      | 0                                     | 0.003    |
| ZG1         | 1:1   | 0.003                  | 0.003                                 |          |
| ZG2         | 2:1   | 0.006                  | 0.006                                 |          |
| ZG3         | 3:1   | 0.009                  | 0.009                                 |          |
| ZG4         | 4:1   | 0.012                  | 0.012                                 |          |
| GO          | 1:0   | 0.003                  | 0.003                                 | -        |
